# Supplementary material for: Men’s Psychotherapy Use, Male Role Norms, and Male-Typical Depression Symptoms: Examining 716 Men and Women Experiencing Psychological Distress
Source: MDPI journal article supplement (doi:10.3390/bs11060083), 2021-06-02
Supplement: s1 [file s1]

**Men’s Psychotherapy Use, Male Role Norms, and Male-Typical Depression Symptoms:  
Examining 716 Men and Women Experiencing Psychological Distress**

**Supplementary material**

**Content**

|                                                                                                                        |               |
|------------------------------------------------------------------------------------------------------------------------|---------------|
| <b>Figure S1:</b> <i>Distribution of Self-Assessed Dimensional Gender</i>                                              | <i>page 2</i> |
| <b>Figure S2:</b> <i>Interaction Effects in Female Participants</i>                                                    | <i>page 3</i> |
| <b>Table S1:</b> <i>Group Comparisons for Heterosexual Male and Female Participants</i>                                | <i>page 4</i> |
| <b>Table S2:</b> <i>Second-Order Partial Correlation Matrices for the applied Questionnaires</i>                       | <i>page 5</i> |
| <b>Table S3:</b> <i>Summary of Binary Logistic Regression Models controlled for Covariates for Male Participants</i>   | <i>page 6</i> |
| <b>Table S4:</b> <i>Summary of Binary Logistic Regression Models controlled for Covariates for Female Participants</i> | <i>page 7</i> |

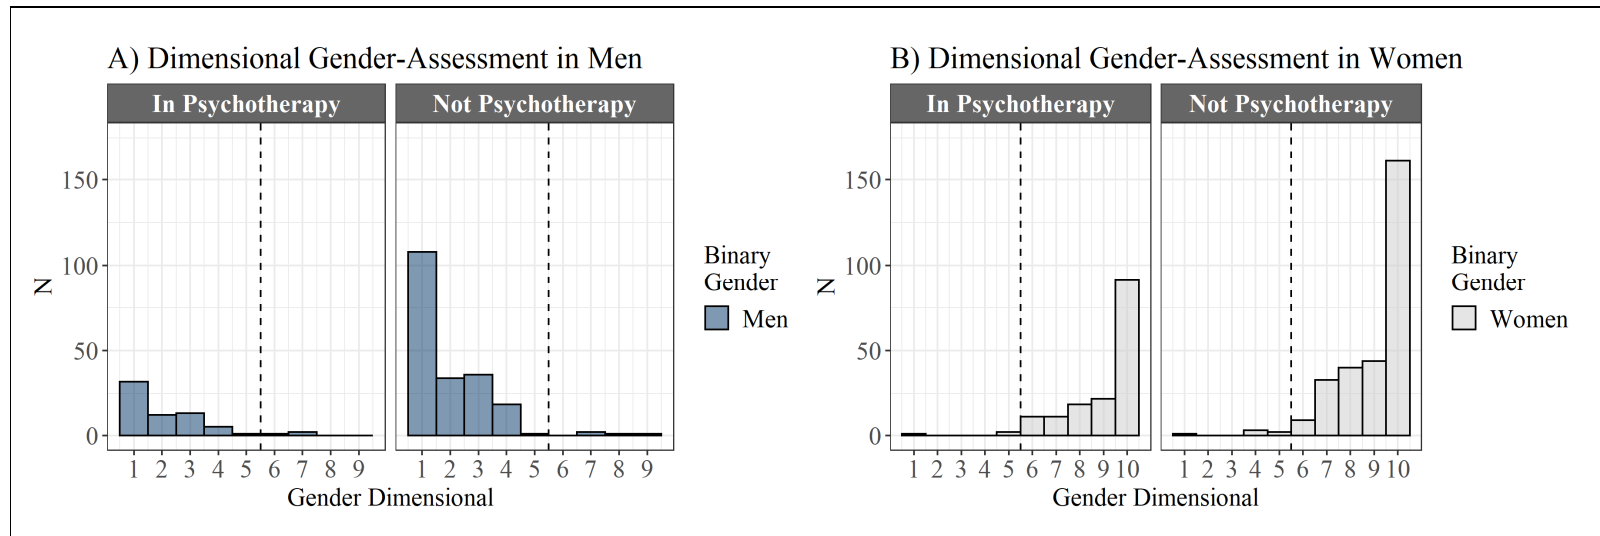

**Figure S1.** Distribution of Self-Assessed Dimensional Gender

*Note.* *N* = Number of participants. 1 = masculine pole, 10 = feminine pole. The vertical dashed line indicates the middle of the scale (above = more towards femininity pole; below = more towards masculinity pole).

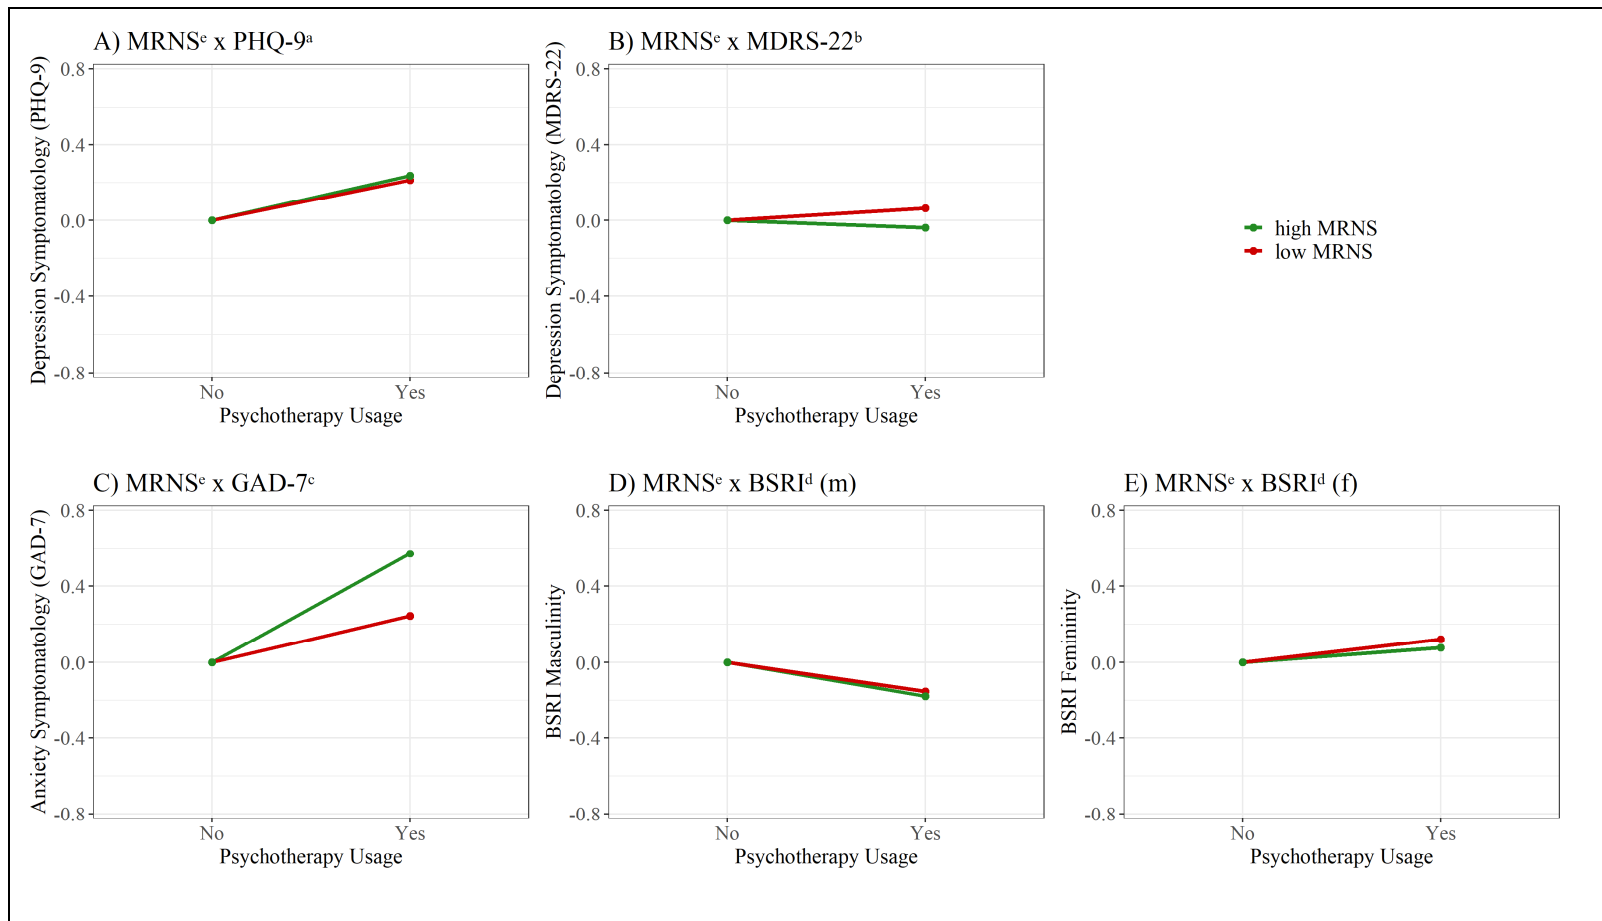

**Figure S2.** Interaction Effects in Female Participants

*Note.* x = interaction, m = masculine subscale, f = feminine subscale. The questionnaire values on the y-axis were z-standardized and linearly transformed to have a joint reference point at y = 0

<sup>a</sup> PHQ-9 = Patient Health Questionnaire - 9

<sup>b</sup> MDRS-22 = Male Depression Risk Scale - 22

<sup>c</sup> GAD-7 = Generalized Anxiety Disorder - 7

<sup>d</sup> BSRI = Bem Sex Role Inventory

<sup>e</sup> MRNS = Male Role Norm Scale

**Table S1.** Group Comparisons for Heterosexual Male and Female Participants

|                 | PHQ-9 <sup>a</sup>    |               |        | MDRS-22 <sup>b</sup>  |             |        | GAD-7 <sup>c</sup> |             |           |
|-----------------|-----------------------|---------------|--------|-----------------------|-------------|--------|--------------------|-------------|-----------|
|                 | M (SD)                | t (df)        | p      | M (SD)                | t (df)      | p      | M (SD)             | t (df)      | p         |
| Men in PT       | 12.4 (6.2)            | −1.48 (186)   | .630   | 30.3 (20.0)           | −2.73 (186) | 0.242  | 10.9 (5.1)         | 1.68 (186)  | 0.094     |
| Men not in PT   | 12.9 (5.6)            |               |        | 34.3 (19.8)           |             |        | 9.5 (4.8)          |             |           |
| Women in PT     | 15.4 (5.6)            | 2.02 (277)    | 0.045* | 32.2 (18.7)           | 0.15 (277)  | 0.0878 | 12.9 (3.9)         | 4.3 (277)   | <0.001*** |
| Women not in PT | 14.0 (5.3)            |               |        | 31.8 (16.6)           |             |        | 10.5 (3.9)         |             |           |
|                 |                       |               |        |                       |             |        |                    |             |           |
|                 | BSRI <sup>d</sup> (m) |               |        | BSRI <sup>d</sup> (f) |             |        | MRNS <sup>e</sup>  |             |           |
|                 | M (SD)                | t (df)        | p      | M (SD)                | t (df)      | p      | M (SD)             | t (df)      | p         |
| Men in PT       | 55.0 (11.5)           | −2.12 (100.1) | 0.037* | 68.8 (13.7)           | 0.49 (186)  | 0.626  | 73.5 (31.4)        | −0.98 (186) | 0.326     |
| Men not in PT   | 59.6 (16.2)           |               |        | 67.6 (14.0)           |             |        | 78.3 (27.1)        |             |           |
| Women in PT     | 54.2 (14.4)           | −1.70 (277)   | 0.094  | 74.9 (11.8)           | 1.13 (277)  | 0.259  | 58.1 (17.3)        | −1.30 (277) | 0.194     |
| Women not in PT | 57.4 (14.7)           |               |        | 73.2 (11.6)           |             |        | 61.7 (22.8)        |             |           |

Note. M = mean score, SD = standard deviation, t = t-value, df = degrees of freedom, p = p-value

<sup>a</sup> PHQ-9 = Patient Health Questionnaire - 9

<sup>b</sup> MDRS-22 = Male Depression Risk Scale - 22

<sup>c</sup> GAD-7 = Generalized Anxiety Disorder - 7

<sup>d</sup> BSRI = Bem Sex-Role Inventory

<sup>e</sup> MRNS = Male Role Norm Scale

\* =  $p < 0.05$ , \*\* =  $p < 0.01$ , \*\*\* =  $p < 0.001$

**Table S2.** Second-Order Partial Correlation Matrices for the applied Questionnaires

| <b>A) Male Participants</b>   |          |           |                          |                            |                          |                             |                             |
|-------------------------------|----------|-----------|--------------------------|----------------------------|--------------------------|-----------------------------|-----------------------------|
| Variable                      | <i>M</i> | <i>SE</i> | <b>PHQ-9<sup>a</sup></b> | <b>MDRS-22<sup>b</sup></b> | <b>GAD-7<sup>c</sup></b> | <b>BSRI<sup>d</sup> (m)</b> | <b>BSRI<sup>d</sup> (f)</b> |
| <b>PHQ-9<sup>a</sup></b>      | 13.7     | 6.0       |                          |                            |                          |                             |                             |
| <b>MDRS-22<sup>b</sup></b>    | 33.7     | 19.7      | <b>0.53***</b>           |                            |                          |                             |                             |
| <b>GAD-7<sup>c</sup></b>      | 10.3     | 5.0       | <b>0.65***</b>           | <b>0.51***</b>             |                          |                             |                             |
| <b>BSRI<sup>d</sup> (m)</b>   | 57.8     | 14.7      | <b>-0.31***</b>          | -0.12                      | <b>-0.19**</b>           |                             |                             |
| <b>BSRI<sup>d</sup> (f)</b>   | 67.9     | 13.3      | -0.08                    | <b>-0.16*</b>              | -0.01                    | <b>0.30***</b>              |                             |
| <b>MRNS<sup>e</sup></b>       | 73.2     | 26.7      | 0.09                     | <b>0.29***</b>             | 0.12                     | <b>0.12*</b>                | <b>-0.22***</b>             |
| <b>B) Female participants</b> |          |           |                          |                            |                          |                             |                             |
| <b>PHQ-9<sup>a</sup></b>      | 14.8     | 5.4       |                          |                            |                          |                             |                             |
| <b>MDRS-22<sup>b</sup></b>    | 32.0     | 17.1      | <b>0.56***</b>           |                            |                          |                             |                             |
| <b>GAD-7<sup>c</sup></b>      | 11.6     | 4.5       | <b>0.63***</b>           | <b>0.46***</b>             |                          |                             |                             |
| <b>BSRI<sup>d</sup> (m)</b>   | 55.7     | 14.0      | <b>-0.30***</b>          | <b>-0.12*</b>              | <b>-0.21***</b>          |                             |                             |
| <b>BSRI<sup>d</sup> (f)</b>   | 73.4     | 11.3      | -0.08                    | -0.02                      | 0.05                     | <b>0.25***</b>              |                             |
| <b>MRNS<sup>e</sup></b>       | 57.7     | 20.1      | -0.03                    | 0.05                       | -0.05                    | 0.04                        | <b>-0.14**</b>              |

*Note.* *m* = masculine subscale, *f* = feminine subscale, *M* = mean value, *SE* = standard error. Partial correlations were controlled for age and educational level.

<sup>a</sup> PHQ-9 = Patient Health Questionnaire—9

<sup>b</sup> MDRS-22 = Male Depression Risk Scale—22

<sup>c</sup> GAD-7 = Generalized Anxiety Disorder—7

<sup>d</sup> BSRI = Bem Sex-Role Inventory

<sup>e</sup> MRNS = Male Role Norm Scale

\* =  $p < 0.05$ , \*\* =  $p < 0.01$ , \*\*\* =  $p < 0.001$

**Table S3.** Summary of the Binary Logistic Regression Models controlled for Covariates for Male Participants

|                                           | No interaction |                | MRNS x PHQ-9        |                | MRNS x MDRS-22 |                     | MRNS x GAD-7       |                | MRNS x BSRI (m) |                | MRNS x BSRI (f) |                |
|-------------------------------------------|----------------|----------------|---------------------|----------------|----------------|---------------------|--------------------|----------------|-----------------|----------------|-----------------|----------------|
| Predictor                                 | $\beta$ (SE)   | <i>p</i>       | $\beta$ (SE)        | <i>p</i>       | $\beta$ (SE)   | <i>p</i>            | $\beta$ (SE)       | <i>p</i>       | $\beta$ (SE)    | <i>p</i>       | $\beta$ (SE)    | <i>p</i>       |
| <b>Intercept</b>                          | 0.12 (1.40)    | 0.930          | 4.17 (1.89)         | <b>0.028*</b>  | 2.02 (1.60)    | 0.207               | 2.18 (1.65)        | 0.186          | -2.35 (2.02)    | 0.244          | -3.24 (2.33)    | 0.164          |
| <b>PHQ-9<sup>a</sup></b>                  | -0.23 (0.34)   | 0.505          | -2.72 (0.84)        | <b>0.001**</b> | -0.18 (0.35)   | 0.609               | -0.15 (0.35)       | 0.660          | -0.24 (0.34)    | 0.481          | -0.20 (0.34)    | 0.558          |
| <b>MDRS-22<sup>b</sup></b>                | -0.71 (0.25)   | <b>0.004**</b> | -0.77 (0.26)        | <b>0.002**</b> | -2.16 (0.63)   | <b>&lt;0.001***</b> | -0.68 (0.25)       | <b>0.006**</b> | -0.71 (0.25)    | <b>0.004**</b> | -0.73 (0.25)    | <b>0.004**</b> |
| <b>GAD-7<sup>c</sup></b>                  | 0.85 (0.31)    | <b>0.006**</b> | 0.99 (0.32)         | <b>0.002**</b> | 1.00 (0.32)    | <b>0.002**</b>      | -0.72 (0.70)       | 0.301          | 0.81 (0.31)     | <b>0.009**</b> | 0.84 (0.31)     | <b>0.007**</b> |
| <b>BSRI<sup>d</sup> (m)</b>               | -0.44 (0.19)   | <b>0.021*</b>  | -0.37 (0.20)        | 0.067          | -0.42 (0.19)   | <b>0.029*</b>       | -0.39 (0.19)       | <b>0.044*</b>  | 0.29 (0.47)     | 0.533          | -0.46 (0.19)    | <b>0.015*</b>  |
| <b>BSRI<sup>d</sup> (f)</b>               | 0.04 (0.19)    | 0.823          | 0.03 (0.20)         | 0.893          | 0.06 (0.20)    | 0.774               | 0.07 (0.20)        | 0.732          | 0.03 (0.20)     | 0.868          | 0.82 (0.48)     | 0.083          |
| <b>MRNS<sup>e</sup></b>                   | -0.02 (0.17)   | 0.902          | -1.53 (0.52)        | <b>0.003**</b> | -0.82 (0.36)   | <b>0.021*</b>       | -1.02 (0.45)       | 0.024*         | 0.97 (0.61)     | 0.113          | 1.19 (0.69)     | 0.086          |
| <b>Age</b>                                | 0.01 (0.01)    | 0.427          | 0.01 (0.02)         | 0.705          | 0.01 (0.02)    | 0.425               | 0.01 (0.01)        | 0.459          | 0.01 (0.01)     | 0.592          | 0.01 (0.01)     | 0.411          |
| <b>Relationship</b>                       | 0.03 (0.14)    | 0.854          | 0.06 (0.15)         | 0.704          | 0.03 (0.15)    | 0.863               | 0.04 (0.15)        | 0.809          | 0.06 (0.15)     | 0.688          | 0.04 (0.14)     | 0.777          |
| <b>Sex. Orient.</b>                       | 0.09 (0.15)    | 0.552          | 0.11 (0.15)         | 0.449          | 0.09 (0.15)    | 0.566               | 0.12 (0.15)        | 0.427          | 0.08 (0.15)     | 0.569          | 0.10 (0.15)     | 0.482          |
| <b>Education</b>                          | -0.03 (0.09)   | 0.757          | -0.07 (0.15)        | 0.427          | -0.04 (0.09)   | 0.690               | -0.03 (0.09)       | 0.783          | -0.03 (0.09)    | 0.740          | -0.02 (0.09)    | 0.864          |
| <b>Interaction</b>                        |                |                | 0.93 (0.29)         | <b>0.001**</b> | 0.47 (0.18)    | <b>0.011*</b>       | 0.58 (0.24)        | <b>0.015*</b>  | -0.27 (0.17)    | 0.097          | -0.30 (0.16)    | 0.073          |
| Omnibus statistics                        |                |                |                     |                |                |                     |                    |                |                 |                |                 |                |
| $\chi^2$ (df)                             | 21.70 (10)     |                | 33.22 (11)          |                | 29.14 (11)     |                     | 27.88 (11)         |                | 24.67 (11)      |                | 24.89 (11)      |                |
| <i>p</i> (omnibus)                        | <b>0.017*</b>  |                | <b>&lt;0.001***</b> |                | <b>0.002**</b> |                     | <b>&lt;0.003**</b> |                | <b>0.010*</b>   |                | <b>0.009**</b>  |                |
| Pseudo <i>R</i> <sup>2</sup> (Nagelkerke) | 0.116          |                | 0.174               |                | 0.154          |                     | 0.147              |                | 0.131           |                | 0.132           |                |

Note. x = interaction, m = masculine subscale, f = feminine subscale,  $\beta$  = estimated regression coefficient, SE = standard error, *p* = *p*-value. All calculations were controlled for age (Age), relationship status (Relationship), sexual orientation (Sex. Orient.) and education level (Education).

<sup>a</sup> PHQ-9 = Patient Health Questionnaire—9

<sup>b</sup> MDRS-22 = Male Depression Risk Scale—22

<sup>c</sup> GAD-7 = Generalized Anxiety Disorder—7

<sup>d</sup> BSRI = Bem Sex-Role Inventory

<sup>e</sup> MRNS = Male Role Norm Scale

\* = *p* < 0.05, \*\* = *p* < 0.01, \*\*\* = *p* < 0.001

**Table S4.** Summary of the Binary Logistic Regression Models controlled for Covariates for Female Participants

|                                              | No interaction      |                     | MRNS x PHQ-9        |                    | MRNS x MDRS-22      |                     | MRNS x GAD-7   |          | MRNS x BSRI (m) |                     | MRNS x BSRI (f) |                     |
|----------------------------------------------|---------------------|---------------------|---------------------|--------------------|---------------------|---------------------|----------------|----------|-----------------|---------------------|-----------------|---------------------|
| Predictor                                    | $\beta$ (SE)        | <i>p</i>            | $\beta$ (SE)        | <i>p</i>           | $\beta$ (SE)        | <i>p</i>            | $\beta$ (SE)   | <i>p</i> | $\beta$ (SE)    | <i>p</i>            | $\beta$ (SE)    | <i>p</i>            |
| <b>Intercept</b>                             | -1.99 (1.12)        | 0.076               | -3.40 (1.37)        | <b>0.013*</b>      | -3.66 (1.29)        | <b>0.005**</b>      | -2.23 (1.41)   | 0.116    | -1.37 (1.86)    | 0.461               | -1.74 (2.63)    | 0.509               |
| <b>PHQ-9<sup>a</sup></b>                     | 0.09 (0.25)         | 0.728               | 1.06 (0.61)         | 0.082              | 0.06 (0.25)         | 0.814               | 0.08 (0.25)    | 0.743    | 0.09 (0.25)     | 0.716               | 0.09 (0.25)     | 0.730               |
| <b>MDRS-22<sup>b</sup></b>                   | -0.32 (0.17)        | 0.061               | -0.31 (0.17)        | 0.065              | 1.02 (0.56)         | <b>0.068*</b>       | -0.32 (0.17)   | 0.060    | -0.32 (0.17)    | 0.060               | -0.32 (0.17)    | 0.060               |
| <b>GAD-7<sup>c</sup></b>                     | 0.80 (0.22)         | <b>&lt;0.001***</b> | 0.82 (0.22)         | <b>&lt;0.001**</b> | 0.82 (0.22)         | <b>&lt;0.001***</b> | 0.96 (0.64)    | .131     | 0.80 (0.22)     | <b>&lt;0.001***</b> | 0.80 (0.22)     | <b>&lt;0.001***</b> |
| <b>BSRI<sup>d</sup> (m)</b>                  | -0.11 (0.12)        | 0.350               | -0.13 (0.13)        | 0.302              | -0.13 (0.13)        | 0.295               | -0.12 (0.12)   | 0.346    | -0.28 (0.41)    | 0.496               | -0.12 (0.12)    | 0.354               |
| <b>BSRI<sup>d</sup> (f)</b>                  | 0.19 (0.15)         | 0.199               | 0.18 (0.15)         | 0.230              | 0.20 (0.15)         | 0.190               | 0.19 (0.15)    | 0.215    | 0.19 (0.15)     | 0.200               | 0.14 (0.52)     | 0.791               |
| <b>MRNS<sup>e</sup></b>                      | -0.20 (0.15)        | 0.173               | 0.38 (0.34)         | 0.274              | 0.46 (0.28)         | 0.109               | -0.10 (0.38)   | 0.793    | -0.43 (0.57)    | 0.454               | -0.29 (0.86)    | 0.739               |
| <b>Age</b>                                   | -0.01 (0.01)        | 0.675               | -0.01 (0.01)        | 0.735              | -0.01 (0.01)        | 0.749               | -0.01 (0.01)   | 0.678    | -0.01 (0.01)    | 0.679               | -0.01 (0.01)    | 0.673               |
| <b>Relationship</b>                          | 0.07 (0.11)         | 0.501               | 0.07 (0.11)         | 0.519              | 0.08 (0.11)         | 0.481               | 0.07 (0.11)    | 0.504    | 0.07 (0.11)     | 0.500               | 0.07 (0.11)     | 0.501               |
| <b>Sex. Orient.</b>                          | 0.02 (0.09)         | 0.852               | 0.01 (0.09)         | 0.868              | 0.01 (0.09)         | 0.929               | 0.02 (0.09)    | 0.859    | 0.01 (0.09)     | 0.868               | 0.02 (0.09)     | 0.850               |
| <b>Education</b>                             | 0.05 (0.07)         | 0.520               | 0.04 (0.08)         | 0.612              | 0.03 (0.07)         | 0.653               | 0.05 (0.07)    | 0.525    | 0.05 (0.07)     | 0.527               | 0.05 (0.07)     | 0.521               |
| <b>Interaction</b>                           |                     |                     | -0.37 (0.21)        | 0.078              | -0.49 (0.20)        | 0.130               | -0.06 (0.21)   | 0.784    | 0.06 (0.14)     | 0.675               | 0.02 (0.18)     | 0.916               |
| Omnibus statistics                           |                     |                     |                     |                    |                     |                     |                |          |                 |                     |                 |                     |
| $\chi^2$ (df)                                | 30.88 (10)          |                     | 33.83 (11)          |                    | 37.41 (11)          |                     | 30.96 (11)     |          | 31.06 (11)      |                     | 30.90 (11)      |                     |
| <i>p</i> (omnibus)                           | <b>&lt;0.001***</b> |                     | <b>&lt;0.001***</b> |                    | <b>&lt;0.001***</b> |                     | <b>0.001**</b> |          | <b>0.001**</b>  |                     | <b>0.001**</b>  |                     |
| pseudo <i>R</i> <sup>2</sup><br>(Nagelkerke) | 0.092               |                     | 0.100               |                    | 0.110               |                     | 0.092          |          | 0.092           |                     | 0.092           |                     |

---

*Note.*  $x$  = interaction,  $m$  = masculine subscale,  $f$  = feminine subscale,  $\beta$  = estimated regression coefficient,  $SE$  = standard error,  $p$  =  $p$ -value. All calculations were controlled for age (*Age*), relationship status (*Relationship*), sexual orientation (*Sex. Orient.*) and education level (*Education*).

<sup>a</sup> PHQ-9 = Patient Health Questionnaire - 9

<sup>b</sup> MDRS-22 = Male Depression Risk Scale - 22

<sup>c</sup> GAD-7 = Generalized Anxiety Disorder - 7

<sup>d</sup> BSRI = Bem Sex-Role Inventory

<sup>e</sup> MRNS = Male Role Norm Scale

\* =  $p < 0.05$ , \*\* =  $p < 0.01$ , \*\*\* =  $p < 0.001$
